# Supplementary material for: Boosting oxygen evolution electrocatalysisviaCeO2engineering on Fe2N nanoparticles for rechargeable Zn–air batteries
Source: Royal Society of Chemistry journal article supplement (doi:10.1039/d3nr00061c), 2023-01-01
Supplement: d3nr00061c1.pdf [file d3nr00061c1.pdf]

## Supporting Information

### **Boosting Oxygen Evolution Electrocatalysis via CeO<sub>2</sub> Engineering on Fe<sub>2</sub>N nanoparticles for rechargeable Zn-air batteries**

Minghui Wang<sup>a</sup>, Jianwei Ren<sup>b,\*</sup>, Hui Wang<sup>a</sup>, Xuyun Wang<sup>a</sup>, Rongfang Wang<sup>a,\*</sup>

<sup>a</sup> College of Chemical Engineering, Qingdao University of Science and Technology, Qingdao, 266042, China

<sup>b</sup> Department of Mechanical Engineering Science, University of Johannesburg, Cnr Kingsway and University Roads, Auckland Park, 2092, Johannesburg, South Africa

\*Corresponding author.

E-mail address: jren@uj.ac.za (J. Ren), rfwang@qust.edu.cn (R. Wang)

#### **Electrochemical measurements**

All oxygen reduction reaction (ORR) and oxygen evolution reaction (OER) tests were performed in a three-electrode system. The ORR test was carried out in 0.1 M KOH solution, and a catalyst-modified platinum-carbon electrode (GCE), Ag/AgCl electrode and platinum wire were used as working electrode, reference electrode and counter electrode, respectively. The catalyst film was prepared as following: the catalyst is ultrasonically dispersed in a 0.25 wt.% Nafion/isopropanol solution with a volume ratio of 1:0.2. Sequentially, 8  $\mu$ L of the dispersion droplet was applied to the electrode surface and dried naturally. For comparison purpose, a commercial Pt/C (20

wt.%, Johnson Matthey) catalyst electrode was also prepared in the same manner. The measured data is converted into the corresponding standard reversible hydrogen electrode potential (RHE) by the Nernst equation:

$$E_{RHE} = E_{Ag/AgCl} + 0.059 pH + 0.197 V.$$

OER tests were performed in 1.0 M KOH solution. The nickel foam loaded with 3 mg of the as-prepared catalyst was used as working electrode, the carbon rod was used as counter electrode, and Hg/HgO was used as reference electrode, respectively. All potentials are IR corrected. The measured data is also converted into the corresponding standard reversible hydrogen electrode potential by the following formula:  $E_{RHE} = E_{Hg/HgO} + 0.059 pH + 0.098 V.$

**Zinc-air battery (ZAB) test:** A Zab cell was assembled with the prepared sample as the cathode, zinc foil as the anode, and a mixture of 6 M KOH and 0.2 M Zn(CH<sub>3</sub>OO)<sub>2</sub> as the electrolyte, respectively. Typically, 4 mg of catalyst, 3 μL of PTFE and 4 mg of conductive carbon black were added to 350 μL of isopropanol and the mixture was stirred to obtain a uniform slurry. The slurry was dried at 40 °C before rolling into sheets, which were pressed against nickel foam under a pressure of 20 MPa.

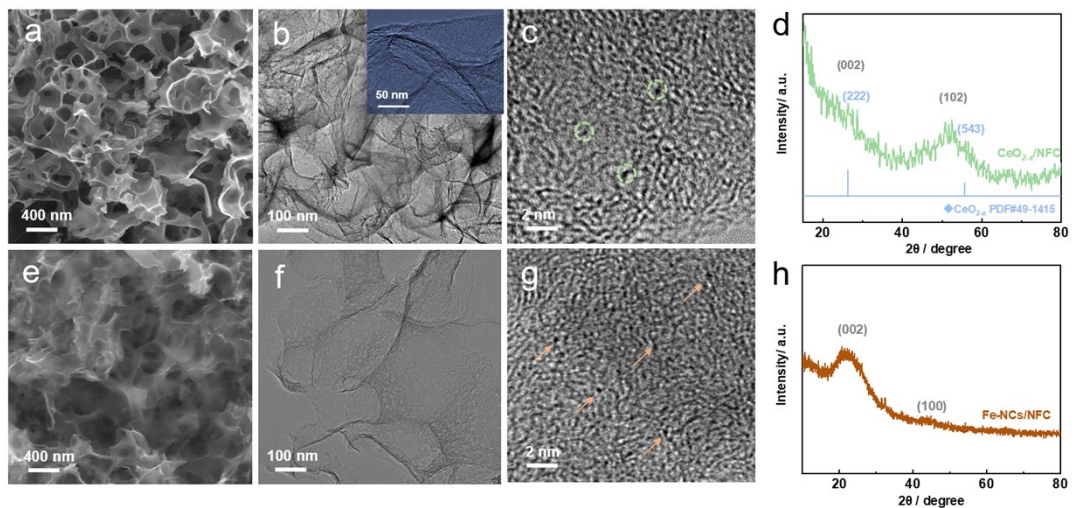

**Fig. S1.** SEM images of: (a)  $\text{CeO}_{2-x}/\text{NFC}$  and (e)  $\text{Fe-NCs}/\text{NFC}$  samples. TEM images of: (b, f)  $\text{CeO}_{2-x}/\text{NFC}$  and (c, g)  $\text{Fe-NCs}/\text{NFC}$  samples; XRD patterns of: (d)  $\text{CeO}_{2-x}/\text{NFC}$  and (h)  $\text{Fe-NCs}/\text{NFC}$  samples.

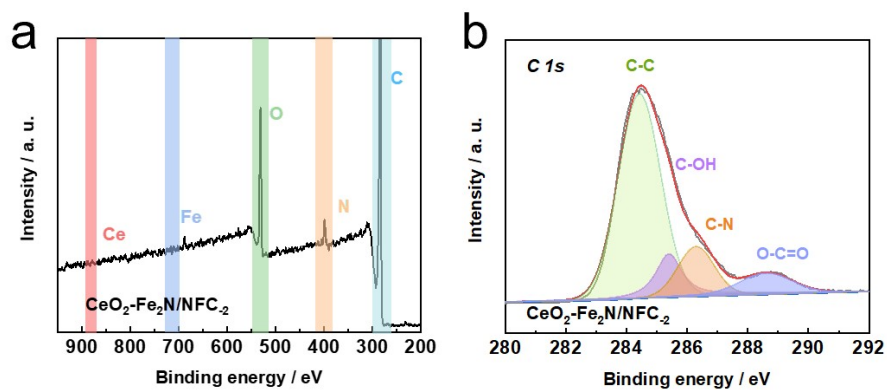

**Fig. S2.** XPS spectra of  $\text{CeO}_2\text{-Fe}_2\text{N}/\text{NFC}_2$  sample: (a) Survey spectra and (b) high-resolution C 1s.

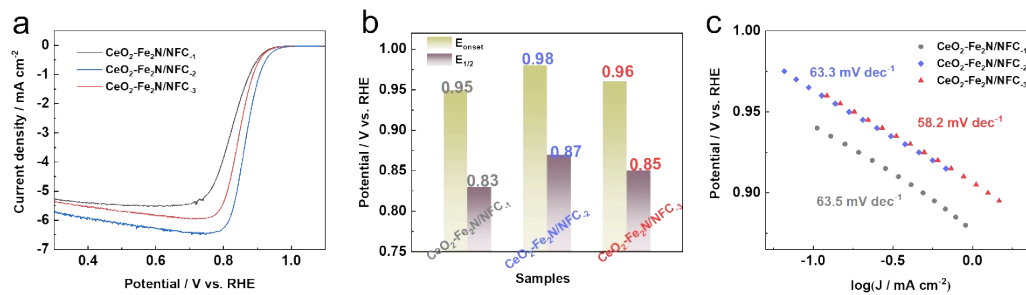

**Fig. S3.** (a) LSV curves; (b)  $E_{\text{onset}}$  and  $E_{1/2}$ ; (c) Tafel plots of  $\text{CeO}_2\text{-Fe}_2\text{N}/\text{NFC}_{-1}$ ,  $\text{CeO}_2\text{-Fe}_2\text{N}/\text{NFC}_{-2}$  and  $\text{CeO}_2\text{-Fe}_2\text{N}/\text{NFC}_{-3}$  samples.

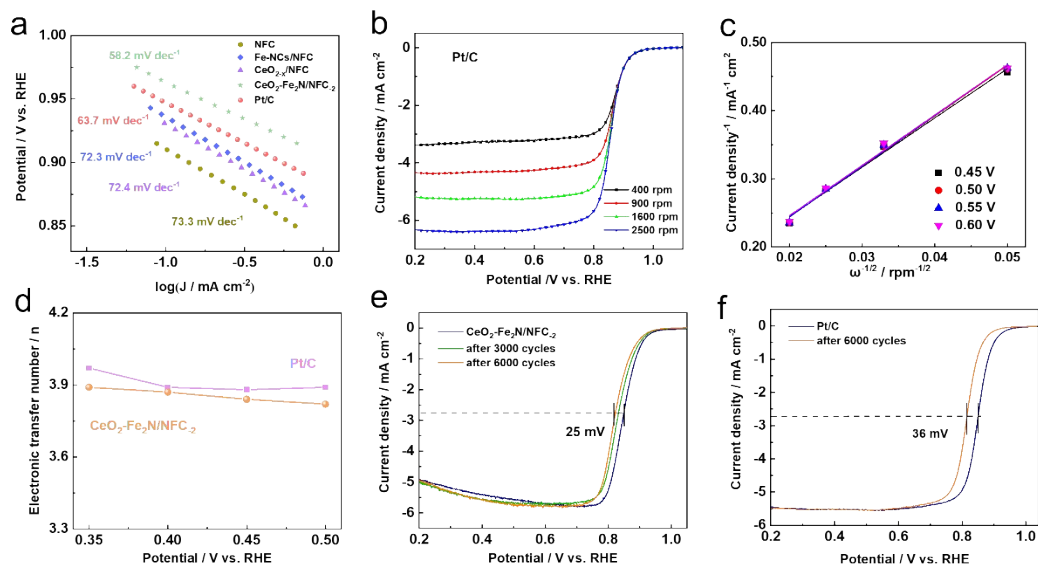

**Fig. S4.** (a) Tafel plots of NFC, Fe-NCs/NFC,  $\text{CeO}_{2-x}$ /NFC,  $\text{CeO}_2\text{-Fe}_2\text{N/NFC}_2$  and Pt/C samples. (b) The polarization curves at different rotation rates; (c) corresponding K-L plots of Pt/C sample; (d) electronic transfer number of  $\text{CeO}_2\text{-Fe}_2\text{N/NFC}_2$  and Pt/C samples. The 1<sup>st</sup> and 6000<sup>th</sup> ORR cycles of samples (e)  $\text{CeO}_2\text{-Fe}_2\text{N/NFC}_2$  and (f) Pt/C.

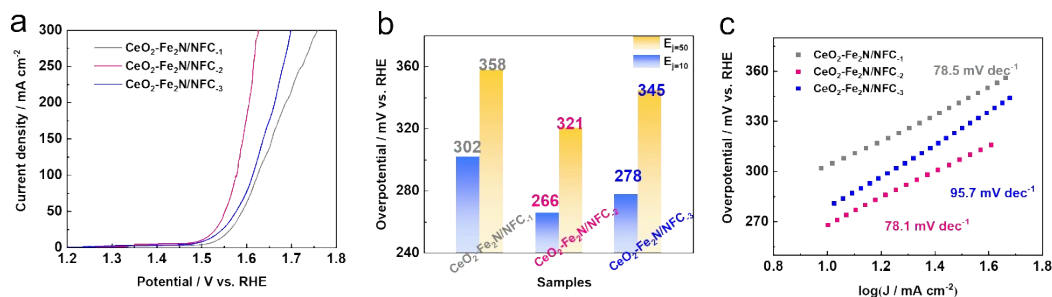

**Fig. S5.** (a) LSV curves; (b) overpotentials at 50 and 10  $\text{mA cm}^{-2}$ ; (c) Tafel plots of  $\text{CeO}_2\text{-Fe}_2\text{N/NFC}_1$ ,  $\text{CeO}_2\text{-Fe}_2\text{N/NFC}_2$  and  $\text{CeO}_2\text{-Fe}_2\text{N/NFC}_3$  samples.

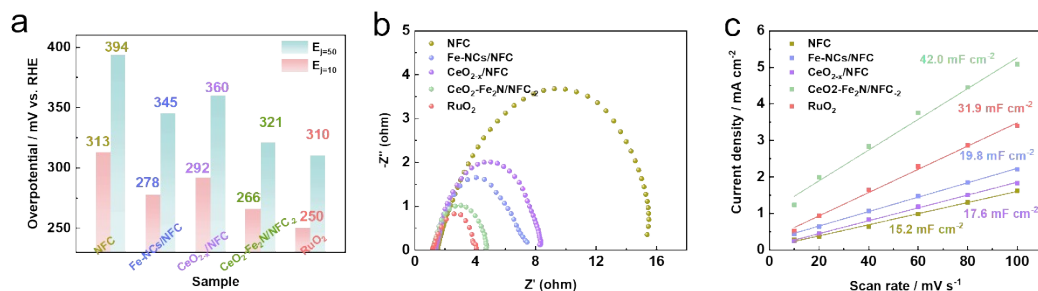

**Fig. S6.** (a) Overpotentials at 50 and 10  $\text{mA cm}^{-2}$ ; (b) EIS Nyquist plots at 1.54 V vs.

RHE; (c) fitting plots of the current density vs the scan rate of five samples ( $\Delta j = j_a - j_c$ )

of NFC, Fe-NCs/NFC, CeO<sub>2-x</sub>/NFC, CeO<sub>2</sub>-Fe<sub>2</sub>N/NFC<sub>2</sub> and RuO<sub>2</sub> samples.

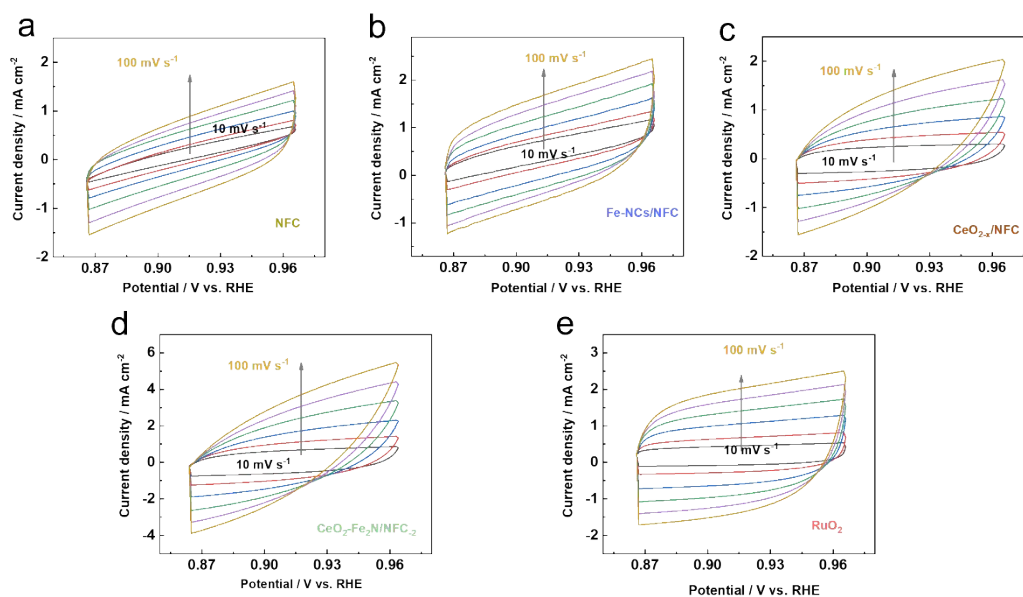

**Fig. S7.** The electrical double-layer capacitance ( $C_{dl}$ ) of samples: (a) NFC; (b) Fe-NCs/NFC; (c) CeO<sub>2-x</sub>/NFC; (d) CeO<sub>2</sub>-Fe<sub>2</sub>N/NFC<sub>2</sub> and (e) RuO<sub>2</sub>.

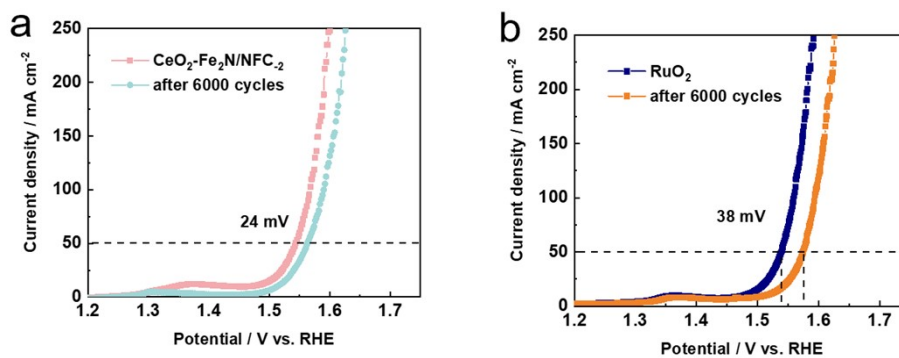

**Fig. S8.** LSV curves of 1<sup>st</sup> and 6000<sup>th</sup> cycles for OER: (a) CeO<sub>2</sub>-Fe<sub>2</sub>N/NFC<sub>2</sub> sample and (b) RuO<sub>2</sub> sample.

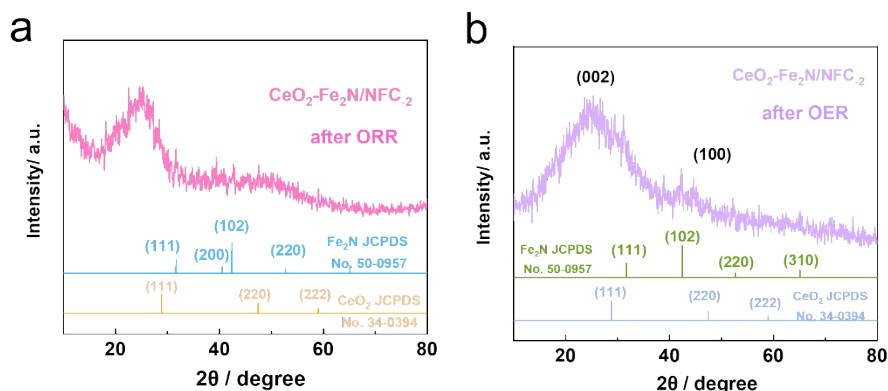

**Fig. S9.** The XRD patterns of the  $\text{CeO}_2\text{-Fe}_2\text{N/NFC}_2$  sample: (a) after ORR stability test; and (b) after OER stability test.

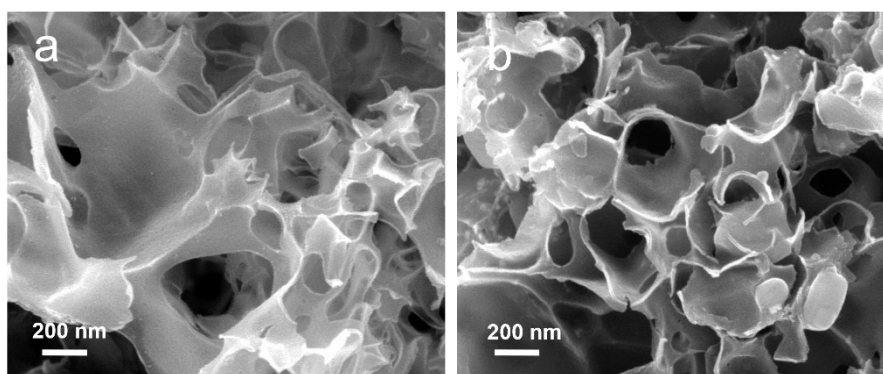

**Fig. S10.** The SEM images of the  $\text{CeO}_2\text{-Fe}_2\text{N/NFC}_2$  sample: (a) after ORR stability test; and (b) after OER stability test.

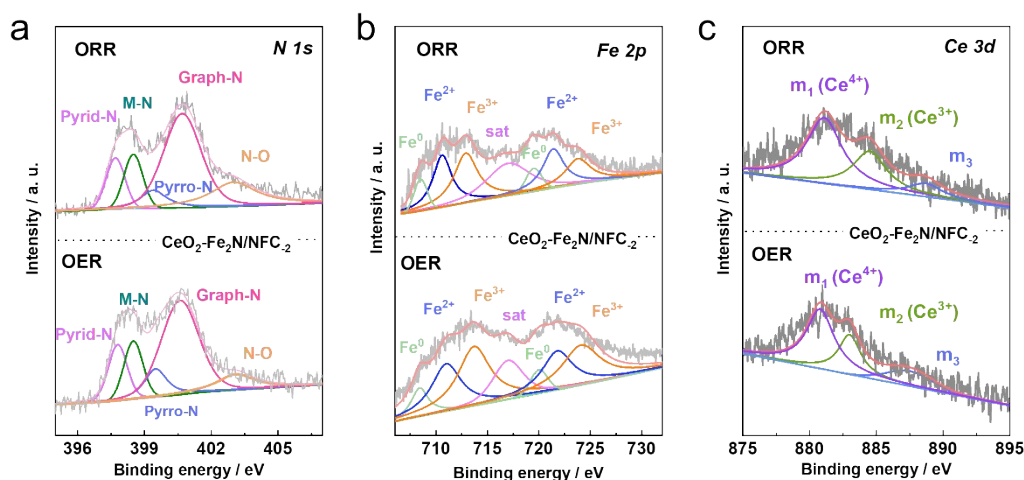

**Fig. S11.** The high-resolution XPS spectra of the  $\text{CeO}_2\text{-Fe}_2\text{N/NFC}_2$  sample after ORR

and OER stability tests: (a) N1s; (b) Fe 2p; and (c) Ce 3d.

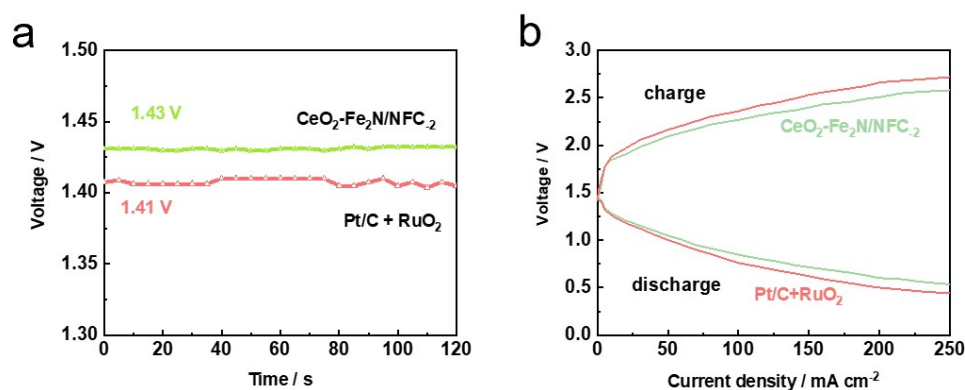

**Fig. S12.** (a) The open circuit voltages; (b) charge/discharge polarization curves of CeO<sub>2</sub>-Fe<sub>2</sub>N/NFC<sub>2</sub> and Pt/C+RuO<sub>2</sub>-based ZAB cells.

**Table S1.** The atomic percentages (at%) of the samples determined from the XPS analysis.

| Sample                                               | C     | O     | N    | Fe   | Ce   |
|------------------------------------------------------|-------|-------|------|------|------|
| Fe-NCs/NFC                                           | 93.95 | 3.46  | 2.26 | 0.33 | 0    |
| CeO <sub>2-x</sub> /NFC                              | 88.07 | 9.12  | 2.76 | 0    | 0.05 |
| CeO <sub>2</sub> -Fe <sub>2</sub> N/NFC <sub>2</sub> | 85.19 | 11.26 | 3.11 | 0.39 | 0.04 |

**Table S2.** Conductivities (S/m) of the prepared samples at different voltages.

| Voltages (mV) | Fe-NCs/NFC | CeO <sub>2-x</sub> /NFC | CeO <sub>2</sub> -Fe <sub>2</sub> N/NFC <sub>2</sub> |
|---------------|------------|-------------------------|------------------------------------------------------|
| 0.3           | 536.2      | 182                     | 235.9                                                |
| 0.5           | 188        | 119                     | 134.6                                                |
| 0.8           | 74.7       | 65.9                    | 72.3                                                 |

**Table S3.** The ORR/OER performance comparison of CeO<sub>2</sub>-Fe<sub>2</sub>N/NFC<sub>2</sub> sample with various catalysts reported in literature.

| Catalysts                                            | ORR                      | OER                                         | Oxygen electrode activity                                        | Reference<br>s |
|------------------------------------------------------|--------------------------|---------------------------------------------|------------------------------------------------------------------|----------------|
|                                                      | $E_{1/2}$<br>(V vs. RHE) | $E_{j=10\text{ mA cm}^{-2}}$<br>(V vs. RHE) | $\Delta E = E_{j=10\text{ mA cm}^{-2}} - E_{1/2}$<br>(V vs. RHE) |                |
| CeO <sub>2</sub> -Fe <sub>2</sub> N/NFC <sub>2</sub> | 0.87                     | 1.49                                        | 0.62                                                             | This work      |
| Co-CeO <sub>2</sub> /C                               | 0.75                     | 1.61                                        | 0.86                                                             | 1              |
| 3Co-LaMOH O <sub>v</sub> @NC                         | 0.83                     | 1.56                                        | 0.73                                                             | 2              |
| CeO <sub>2</sub> @CoSe <sub>2</sub> -NCs             | 0.76                     | 1.55                                        | 0.79                                                             | 3              |
| CeO <sub>2</sub> -FeNC-5                             | 0.90                     | 1.55                                        | 0.65                                                             | 4              |
| FeNi@N-CNT/NCS                                       | 0.84                     | 1.59                                        | 0.75                                                             | 5              |
| FeCo-NC <sub>ps</sub>                                | 0.85                     | 1.61                                        | 0.76                                                             | 6              |
| SA-Fe-Nx-MPCS                                        | 0.88                     |                                             |                                                                  | 7              |
| Fe-MNC                                               | 0.85                     | 1.53                                        | 0.68                                                             | 8              |
| FeNC-CoS <sub>2</sub>                                | 0.85                     | 1.61                                        | 0.76                                                             | 9              |
| Fe-NSDC                                              | 0.84                     | 1.65                                        | 0.81                                                             | 10             |
| Ce/Fe-NCNW                                           | 0.91                     |                                             |                                                                  | 11             |
| Fe-Me-Ni                                             | 0.84                     | 1.54                                        | 0.70                                                             | 12             |
| Mn-RuO <sub>2</sub>                                  | 0.86                     | 1.50                                        | 0.64                                                             | 13             |

**Table S4.** Summary of recently reported high-performance rechargeable Zn-air batteries with various bi-functional electrocatalysts.

| Catalysts          | Peak power density<br>(mW cm <sup>-2</sup> ) | charge/discharge voltage<br>gap (V) | References |
|--------------------|----------------------------------------------|-------------------------------------|------------|
| CeO <sub>2</sub> - | 133                                          | 0.68 @20 mA cm <sup>-2</sup>        | This work  |



|                                                                |     |                              |    |
|----------------------------------------------------------------|-----|------------------------------|----|
| Fe <sub>2</sub> N/NFC-<br>3Co-<br>LaMOH O <sub>V</sub> @<br>NC | 110 | 0.98 @5 mA cm <sup>-2</sup>  | 2  |
| CeO <sub>2</sub> @CoSe <sub>2</sub> -<br>NCs                   | 153 | 0.86 @5 mA cm <sup>-2</sup>  | 3  |
| CeO <sub>2</sub> -FeNC-5                                       | 169 | 0.83 @10 mA cm <sup>-2</sup> | 4  |
| FeNi@N-<br>CNT/NCS                                             | 103 | 0.73 @10 mA cm <sup>-2</sup> | 5  |
| Fe-MNC                                                         | 137 |                              | 8  |
| M-2                                                            | 124 | 0.71 @20 mA cm <sup>-2</sup> | 14 |

## References

- 1 Z. Liu, J. Wan, M. Li, Z. Shi, J. Liu and Y. Tang, *Nanoscale.*, 2022, **14**, 1997-2003.
- 2 J. Zhang, J. Chen, Y. Luo, Y. Chen, C. Zhang, Y. Luo, Y. Xue, H. Liu, G. Wang and R. Wang, *J. Energy Chem.*, 2021, **60**, 503-511.
- 3 Y. Huang, Y. Liu, Y. Deng, J. Zhang, B. He, J. Sun, Z. Yang, W. Zhou and L. Zhao, *J. Colloid Interface Sci.*, 2022, **625**, 839-849.
- 4 Y. Huang, Y. Zhang, J. Hao, Y. Wang, J. Yu, Y. Liu, Z. Tian, T. S. Chan, M. Liu, W. Li and J. Li, *J. Colloid Interface Sci.*, 2022, DOI: 10.1016/j.jcis.2022.09.066, 1067–1076.
- 5 J.-T. Ren, L. Chen, Y.-S. Wang, W.-W. Tian, L.-J. Gao and Z.-Y. Yuan, *ACS Sustain. Chem. Eng.*, 2019, **8**, 223-237.
- 6 J. Liu, T. He, Q. Wang, Z. Zhou, Y. Zhang, H. Wu, Q. Li, J. Zheng, Z. Sun, Y. Lei, J. Ma and Y. Zhang, *J. Mater. Chem. A.*, 2019, **7**, 12451-12456.
- 7 X. Fu, G. Jiang, G. Wen, R. Gao, S. Li, M. Li, J. Zhu, Y. Zheng, Z. Li, Y. Hu, L. Yang, Z. Bai, A. Yu and Z. Chen, *Appl. Catal. B.*, 2021, **293**, 120176-120184.
- 8 X. Luo, Z. Liu, Y. Ma, Y. Nan, Y. Gu, S. Li, Q. Zhou and J. Mo, *J. Alloys Compd.*, 2021, **888**, 161464-161472.
- 9 Y. Mi, W. Wang, Y. Hao, Y. Kang, S. Imhanria and Z. Lei, *J. Taiwan Inst. Chem. Eng.*, 2021, **118**, 334-341.
- 10 J. Zhang, M. Zhang, Y. Zeng, J. Chen, L. Qiu, H. Zhou, C. Sun, Y. Yu, C. Zhu and Z. Zhu, *Small.*, 2019, **15**, 1900307-1900317.
- 11 J.-C. Li, S. Maurya, Y. S. Kim, T. Li, L. Wang, Q. Shi, D. Liu, S. Feng, Y. Lin and M. Shao, *ACS Catal.*, 2020, **10**, 2452-2458.
- 12 Y. Tang, Y. Lei, G. Li, T. Fu, Y. Xiang, J. Sha, H. Yang, P. Yu, Y. Si and C. Guo, *J. Mater. Chem. A.*, 2022, **10**, 5305-5316.
- 13 C. Zhou, X. Chen, S. Liu, Y. Han, H. Meng, Q. Jiang, S. Zhao, F. Wei, J. Sun, T. Tan and R. Zhang, *J. Am. Chem. Soc.*, 2022, **144**, 2694-2704.
- 14 J. Ding, P. Wang, S. Ji, H. Wang, V. Linkov and R. Wang, *Electrochim. Acta.*, 2019, **296**, 653-661.
